# Supplementary material
Source: PubMed Central journal article supplement (PMC8523119)
Supplement: 11325_2021_2515_MOESM1_ESM.pdf [file 11325_2021_2515_MOESM1_ESM.pdf]

# Sleep patterns in health care workers during COVID-19

As two Sleep Medicine doctors that work with you at the VA and Kaleida, we have noticed the toll this pandemic is taking on the health care workers of Western New York. We are performing a study to describe how you are sleeping and feeling during this time, so we can inform ways to support you now and in the future.

We are doing that through an electronic survey. The survey is short, voluntary and ANONYMOUS. None of your answers will be tied to your name nor will they affect you or your job in any way. We cannot track who answers what.

By answering the questions below, you agree to participate in this study.

Thank you,

Drs. Amanda Hassinger and Archana Mishra  
Department of Medicine, Division of Pulmonary, Critical Care and Sleep Medicine

If you have any questions, contact Dr. Hassinger at [albrooks@buffalo.edu](mailto:albrooks@buffalo.edu) or 716-323-0158.

---

What is your role in the hospital?

- Respiratory therapist
- Pharmacist
- Physician
- Registered Nurse
- Medical assistant
- Nurses' aide
- Environmental services
- Administration or registration staff
- Physical or occupational therapist
- Child life
- Other not listed here

---

Describe your role/job:

\_\_\_\_\_

---

At what hospitals have you been working during this pandemic (check all that apply if you work in multiple locations):

- Buffalo General Medical Center/Gates Vascular Institute
- Millard Fillmore Suburban
- Oishei Children's Hospital
- The VA of WNY
- I have been outpatient only
- Other hospital not listed here

---

Name of the other hospital where are working or have worked during the pandemic:

\_\_\_\_\_

---

What is your current level as a physician?

- Resident
- Fellow
- Attending

---

What type of residency are you in?

- Medical (eg. Pediatrics, Internal Medicine, Med/Peds)  
 Surgical (eg. Neurosurgery, Pediatric Surgery, ENT)  
 OB/GYN  
 In a prelim year (e.g. for Radiology, Psych)
- 

How often do/have you come into contact with samples, equipment or patients with COVID-19 (or suspected to have COVID)?

- Never  
 At least once, but less than 5 times  
 Once a week  
 Every day
- 

Do you think you had or have COVID-19?

- Yes  
 No  
 (This is anonymous and optional)
- 

Do you work in a hospital emergency room or intensive care unit?

- Yes  
 No
- 

Describe how your job has changed during the COVID-19 pandemic (choose all that apply):

- Not at all  
 Increased the amount of time that I work  
 Decreased the amount of time that I work  
 It has changed my work location (For example, "I have been reassigned to the ER")  
 It has changed my job (For example, "I was a scheduling person and now I screen at the ER entrance.")  
 I now work primarily from home  
 I have been furloughed  
 Other (please describe below)
- 

Please describe how COVID-19 has changed your job:

\_\_\_\_\_

---

Choose all of the reasons that the COVID-19 pandemic has been difficult for you:

- Not at all  
 Increased home responsibilities  
 Demands of work during the pandemic  
 Increased use of technology  
 Concern about you or your loved ones getting sick  
 Financial difficulties  
 Emotional stress  
 Other
- 

Please describe the other reason this pandemic has been difficult for you:

\_\_\_\_\_

---

For how many children are you the primary care giver (include grandchildren, cousins, foster children, etc.)?

\_\_\_\_\_ (Enter "0" if none currently)

---

Check the age categories that include the ages of your children or the children you care for:

(For example, I have a 6-year-old and 1-year-old twins, so I would check "Preschool or toddler" and "School-age")

- Infant or newborn (less than 1 year old)  
 Preschool or toddler (between 1-4 years old)  
 School-age (between 5 and 12 years old)  
 Adolescent still living at home (12-20 years old)  
 Adult (20 years old and older)

Has the pandemic taken away or changed your child care plans?  Yes  No

Is there another adult in the home to help with child care?  Yes  No

Are you spending more than 15 minutes per day on helping with your children's schooling or educational tasks?  Yes  No

Has providing child care impacted your ability to do your job?  Yes  No

Have you changed where you live or whom you live with during the COVID pandemic?  Yes  No

(For example, not staying at home to protect a vulnerable family member)

**Answer each item with how frequently they are happening NOW, during the COVID-19 pandemic.**

**\*\*If this is unchanged from before COVID-19, please check the last box as well.\*\***

|                                                                           | Never                    | Almost Never             | Sometimes                | Fairly Often             | Very Often               | This is no different from how I felt BEFORE COVID-19 |
|---------------------------------------------------------------------------|--------------------------|--------------------------|--------------------------|--------------------------|--------------------------|------------------------------------------------------|
| You feel upset because of something that happened unexpectedly            | <input type="checkbox"/>                             |
| You feel that you are unable to control the important things in your life | <input type="checkbox"/>                             |
| You feel nervous and "stressed"                                           | <input type="checkbox"/>                             |
| You feel unable to handle your personal problems                          | <input type="checkbox"/>                             |
| You feel that things are not going your way                               | <input type="checkbox"/>                             |
| You can not cope with all the things that you have to do                  | <input type="checkbox"/>                             |
| You are unable to control irritations in your life                        | <input type="checkbox"/>                             |
| You feel like you are not on top of things                                | <input type="checkbox"/>                             |

|                                                                        |                          |                          |                          |                          |                          |                          |
|------------------------------------------------------------------------|--------------------------|--------------------------|--------------------------|--------------------------|--------------------------|--------------------------|
| You get angry because things are out of your control                   | <input type="checkbox"/> |
| Your difficulties are piling up so high that you can not overcome them | <input type="checkbox"/> |
| You feel down, depressed or hopeless                                   | <input type="checkbox"/> |
| You have little interest or pleasure in doing things                   | <input type="checkbox"/> |

How often would you agree with the statement "I have become more callous to others since the pandemic began"

- Never  
 A few times or less  
 Once a month or less  
 A few times a month  
 Once a week  
 A few times a week  
 Every day

How often would you agree with the statement "I feel burned out from my work."

- Never  
 A few times or less  
 Once a month or less  
 A few times a month  
 Once a week  
 A few times a week  
 Every day

Prior to COVID-19, had you ever been diagnosed, treated for or been suspicious that you have any of the following (Choose all that apply)?

- Anxiety  
 Depression  
 Insomnia  
 Sleep apnea or loud snoring with pauses in breathing  
 None of the above

**BEFORE COVID-19, describe each aspect of your sleep listed below.**

**\*\*If these answers are the same NOW during COVID-19 as they were BEFORE COVID-19, please check the last box. It will save you follow-up questions.\*\***

|                                                                                            | Never                    | Rarely (i.e. once or twice a month) | Sometimes                | Often (i.e. two or three times per week) | Usually                  | Always                   | This is has not changed DURING the pandemic |
|--------------------------------------------------------------------------------------------|--------------------------|-------------------------------------|--------------------------|------------------------------------------|--------------------------|--------------------------|---------------------------------------------|
| How often did you have a set sleep schedule (going to bed and waking up at the same time)? | <input type="checkbox"/> | <input type="checkbox"/>            | <input type="checkbox"/> | <input type="checkbox"/>                 | <input type="checkbox"/> | <input type="checkbox"/> | <input type="checkbox"/>                    |

|                                                                                                                                                                             |                          |                          |                          |                          |                          |                          |                          |
|-----------------------------------------------------------------------------------------------------------------------------------------------------------------------------|--------------------------|--------------------------|--------------------------|--------------------------|--------------------------|--------------------------|--------------------------|
| How often did you wake up refreshed?                                                                                                                                        | <input type="checkbox"/> |
| How often would you stay awake all day without napping or dozing off?                                                                                                       | <input type="checkbox"/> |
| How often would you be asleep (or trying to sleep) between 2am and 4am?                                                                                                     | <input type="checkbox"/> |
| How often would you spend less than 30 minutes awake total during the period of time that you are trying to sleep? (including time to fall asleep and nighttime awakenings) | <input type="checkbox"/> |
| How often would get 6 and 8 hours of sleep per day?                                                                                                                         | <input type="checkbox"/> |
| How often did you have nightmares (or vivid dreams that cause bad emotions like anxiety or fear)?                                                                           | <input type="checkbox"/> |

**IF YOU REPORT THIS HAS CHANGED DURING THE PANDEMIC, answer how often each of the following are happening during COVID-19:**

**If you reported this is the same as previous, this section will be blank. Proceed straight to the next question.**

|                                                                                        | Never                 | Rarely (i.e once or twice a month) | Sometimes             | Often (i.e. two or three times per week) | Usually               | Always                |
|----------------------------------------------------------------------------------------|-----------------------|------------------------------------|-----------------------|------------------------------------------|-----------------------|-----------------------|
| How often do you have a set sleep schedule?                                            | <input type="radio"/> | <input type="radio"/>              | <input type="radio"/> | <input type="radio"/>                    | <input type="radio"/> | <input type="radio"/> |
| How often do you wake up rested/refreshed?                                             | <input type="radio"/> | <input type="radio"/>              | <input type="radio"/> | <input type="radio"/>                    | <input type="radio"/> | <input type="radio"/> |
| How often do you need a nap or do you doze off during the day?                         | <input type="radio"/> | <input type="radio"/>              | <input type="radio"/> | <input type="radio"/>                    | <input type="radio"/> | <input type="radio"/> |
| How often are you sleeping (or trying to sleep) between 2am and 4am?                   | <input type="radio"/> | <input type="radio"/>              | <input type="radio"/> | <input type="radio"/>                    | <input type="radio"/> | <input type="radio"/> |
| How often do you spend less than 30 minutes awake total while you are trying to sleep? | <input type="radio"/> | <input type="radio"/>              | <input type="radio"/> | <input type="radio"/>                    | <input type="radio"/> | <input type="radio"/> |
| How often are you getting 6 to 8 hours of sleep per day?                               | <input type="radio"/> | <input type="radio"/>              | <input type="radio"/> | <input type="radio"/>                    | <input type="radio"/> | <input type="radio"/> |

How often are you having nightmares?

What is the biggest change in your overall sleep patterns that you have noticed since the start of the pandemic (choose only one choice)?

- There have been no changes in my sleep  
 Trouble falling asleep or staying asleep  
 I take more naps or doze off more during the day  
 My sleep schedule has changed (For example, I sleep in later or go to bed later)  
 I sleep more or less overall  
 Other (not listed above)

Describe the biggest change in your sleep patterns that you have noticed during the pandemic:

\_\_\_\_\_

**DURING the pandemic, you could be changing daytime habits which are impacting your sleep. These are a few of the examples below.**

**\*\*\*If this is the same as BEFORE the pandemic, check the last box as well.\*\*\***

|                                                                              | Never                    | Rarely,<br>once or<br>twice this<br>rotation | Sometimes,<br>once or<br>twice per<br>week | Often,<br>several<br>times per<br>week | Most days                | Every day                | Check here<br>if this is the<br>SAME as<br>BEFORE<br>the<br>pandemic |
|------------------------------------------------------------------------------|--------------------------|----------------------------------------------|--------------------------------------------|----------------------------------------|--------------------------|--------------------------|----------------------------------------------------------------------|
| Drink caffeine (including iced tea, pop, coffee) within 12 hours of bed time | <input type="checkbox"/> | <input type="checkbox"/>                     | <input type="checkbox"/>                   | <input type="checkbox"/>               | <input type="checkbox"/> | <input type="checkbox"/> | <input type="checkbox"/>                                             |
| Drink alcohol within 6 hours of bed time                                     | <input type="checkbox"/> | <input type="checkbox"/>                     | <input type="checkbox"/>                   | <input type="checkbox"/>               | <input type="checkbox"/> | <input type="checkbox"/> | <input type="checkbox"/>                                             |
| Use tobacco within 4-6 hours of bed time                                     | <input type="checkbox"/> | <input type="checkbox"/>                     | <input type="checkbox"/>                   | <input type="checkbox"/>               | <input type="checkbox"/> | <input type="checkbox"/> | <input type="checkbox"/>                                             |
| Look at/use a cell phone, tablet or laptop after sundown                     | <input type="checkbox"/> | <input type="checkbox"/>                     | <input type="checkbox"/>                   | <input type="checkbox"/>               | <input type="checkbox"/> | <input type="checkbox"/> | <input type="checkbox"/>                                             |

**ALMOST THERE!**

**These are the last questions. Knowing who you are will help us put your previous answers into context. As with all of the previous questions, these are OPTIONAL and not MANDATORY.**

How old are you?

\_\_\_\_\_ (In years)

---

**Ethnicity**

- Hispanic or Latino    NOT Hispanic or Latino    Unknown / Not Reported
- 

**Race**

- American Indian/Alaska Native  
 Asian  
 Native Hawaiian or Other Pacific Islander  
 Black or African American  
 White  
 More Than One Race  
 Unknown / Not Reported
- 

**Sex**

- Female    Male
- 

**Which best describes your relationship status?**

- Single  
 Married  
 Dating but living separately  
 Divorced or separated  
 Dating and living together  
 It's complicated
